# Supplementary material for: Time-resolved IR spectroscopy of a trinuclear palladium complex in solution
Source: Royal Society of Chemistry journal article supplement (doi:10.1039/c5cp00959f), 2015-01-01
Supplement: c5cp00959f1.pdf [file c5cp00959f1.pdf]

Supplementary Information:

## Time-Resolved IR Spectroscopy of a Trinuclear Palladium Complex in Solution

by

M. Zimmer, F. Rupp, P. Singer, F. Walz,

F. Breher\*, W. Klopper\*, R. Diller\* and M. Gerhards\*

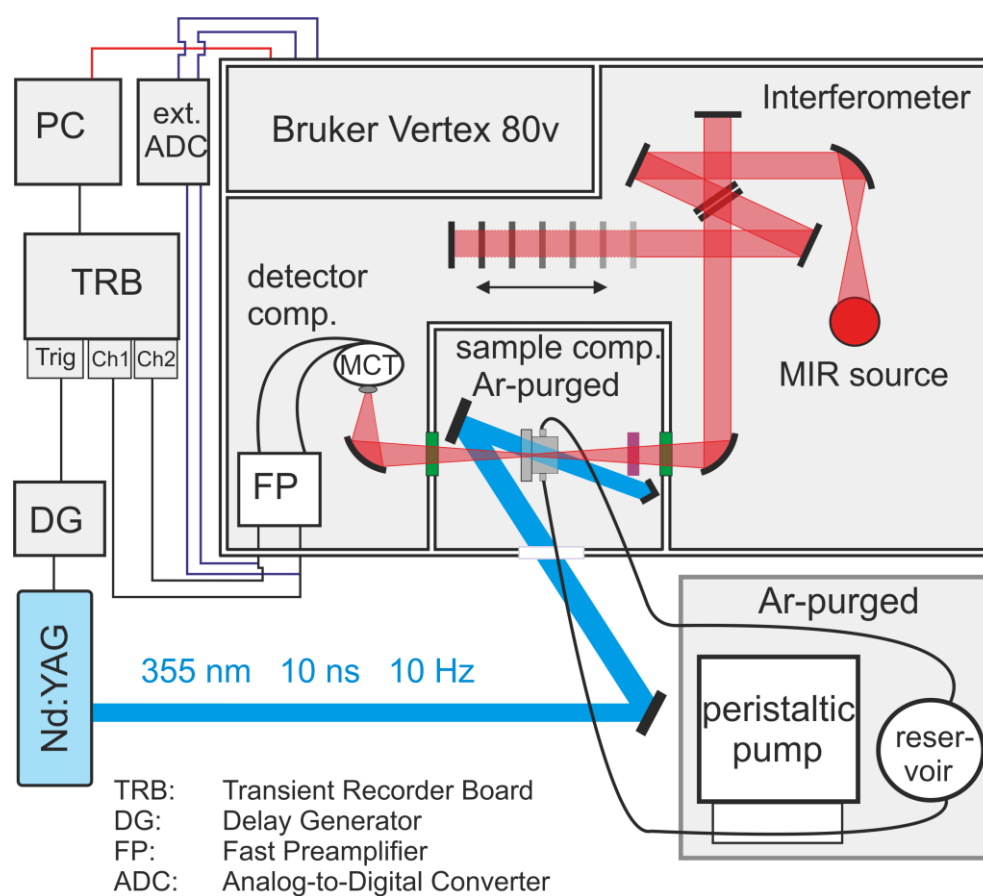

**Fig. SI\_1:** Schematic view of the time-resolved step-scan FTIR setup including the Bruker VERTEX 80v spectrometer, for more details cf. section 2 of the paper.

As mentioned in the experimental section of the paper DC and AC spectra were used to calculate  $\Delta A$  (change in absorbance). The advantage of this method over the pure DC detection is that the AC channel only measures the changes that occur due to the excitation, while the DC channel detects the complete IR signal. Thus, the AC channel provides a greater amplification than the DC channel leading to a better signal-to-noise ratio and small signals that would be lost in the "bit noise" of the DC channel can only be detected with the AC channel.

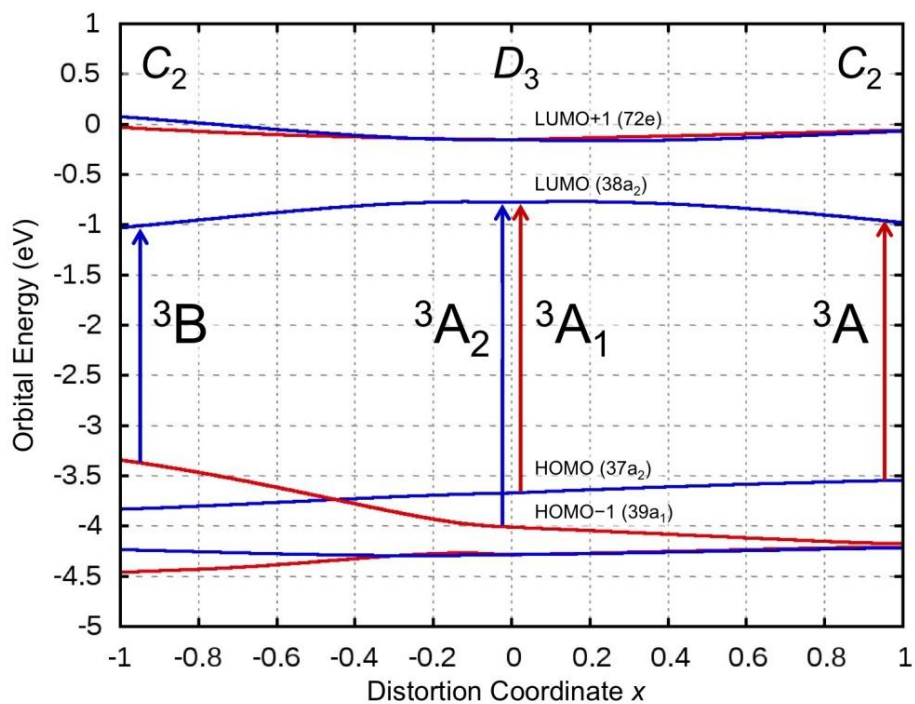

**Fig. SI\_2:** Correlation diagram showing the energies of the frontier orbitals as a function of the distortion coordinate  $x$  (B3LYP/TZVP level). The orbitals exhibit either a (red) or b (blue) symmetry.

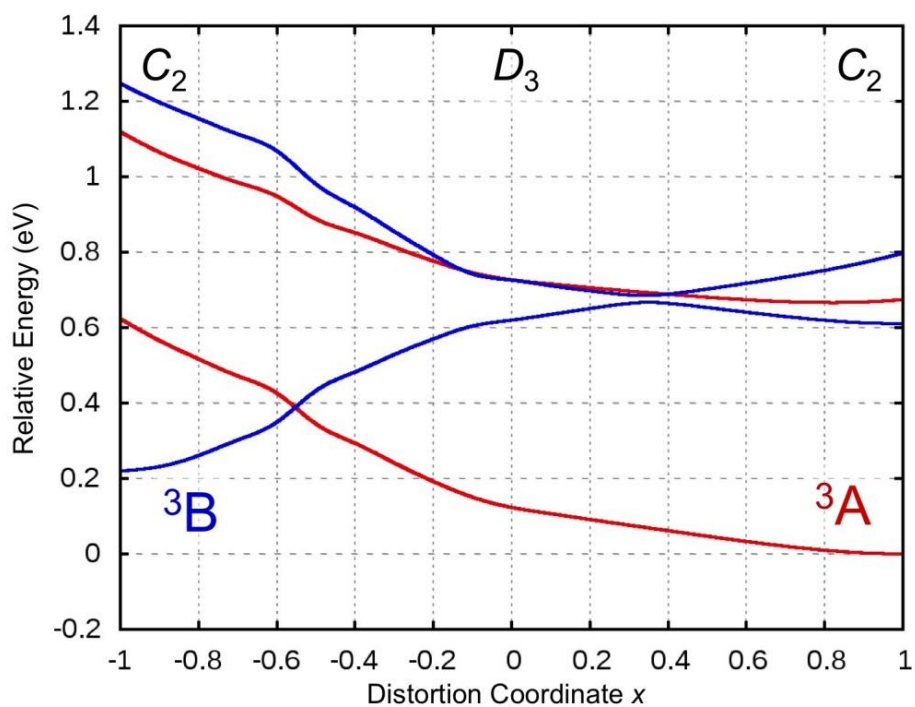

**Fig. SI\_3:** Energies of low-lying  $^3A$  (red) and  $^3B$  (blue) excited states as a function of the distortion coordinate  $x$  (B3LYP/TZVP level; energies are given relative to the lowest triplet state in its optimized  $C_2$ -symmetric geometry).

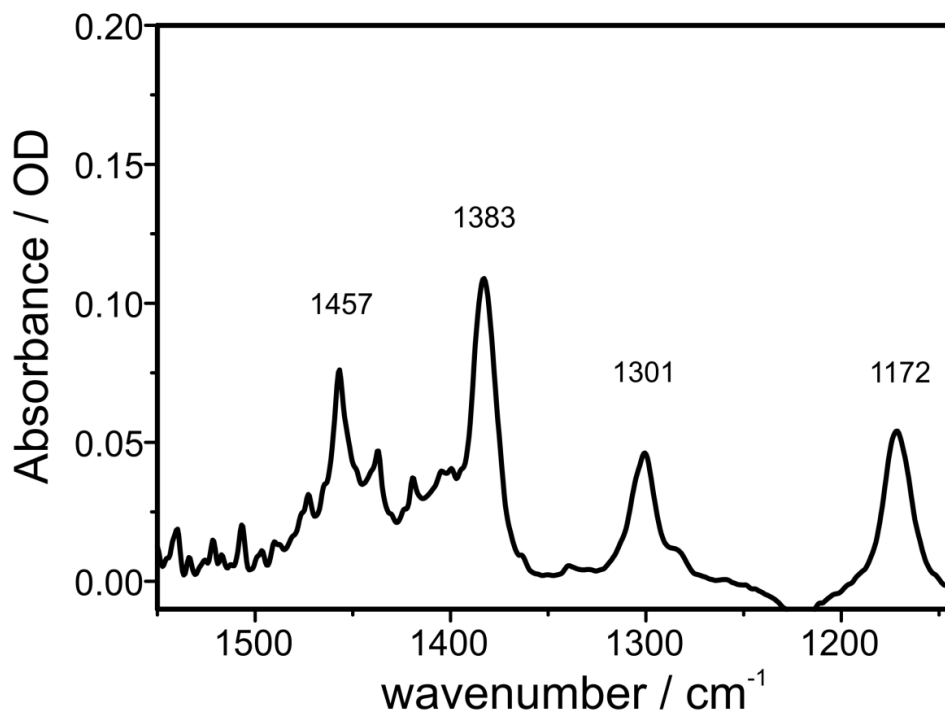

**Fig. SI\_4:** Steady state FTIR spectrum of **1** in DMSO-d<sub>6</sub> in the relevant region of the time-resolved measurements; solvent contributions are subtracted (a negative absorbance occurs at 1220 cm<sup>-1</sup> due to a strong DMSO-d<sub>6</sub> absorption). Note that below 1100 cm<sup>-1</sup> IR transitions are hidden by the solvent, and between 1500 cm<sup>-1</sup> and the region of the CH stretching vibrations no vibrational transitions are observed.

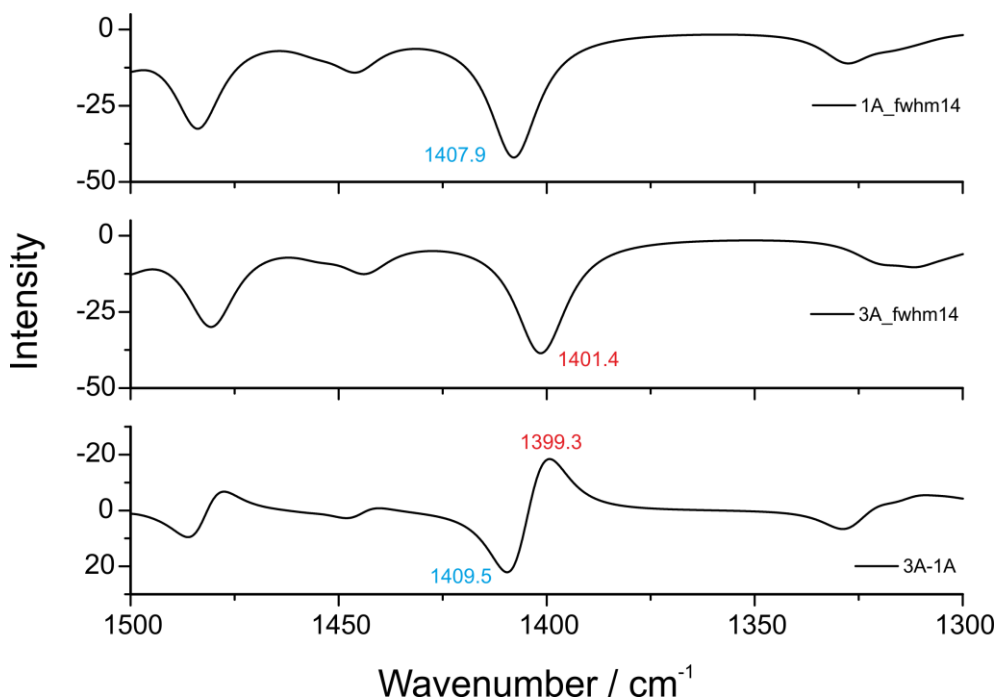

**Fig. SI\_5:** This graph illustrates how the apparent peaks observed in the IR difference spectrum (bottom) of the electronic ground state (<sup>1</sup>A, top) and the excited state (<sup>3</sup>A, middle) spectrum are shifted with respect to the peaks observed in the corresponding “pure” spectra. The apparent peak positions of the difference spectra are mentioned in the manuscript. For comparison between experiment and theory always this shift of the spectra has to be taken into account.

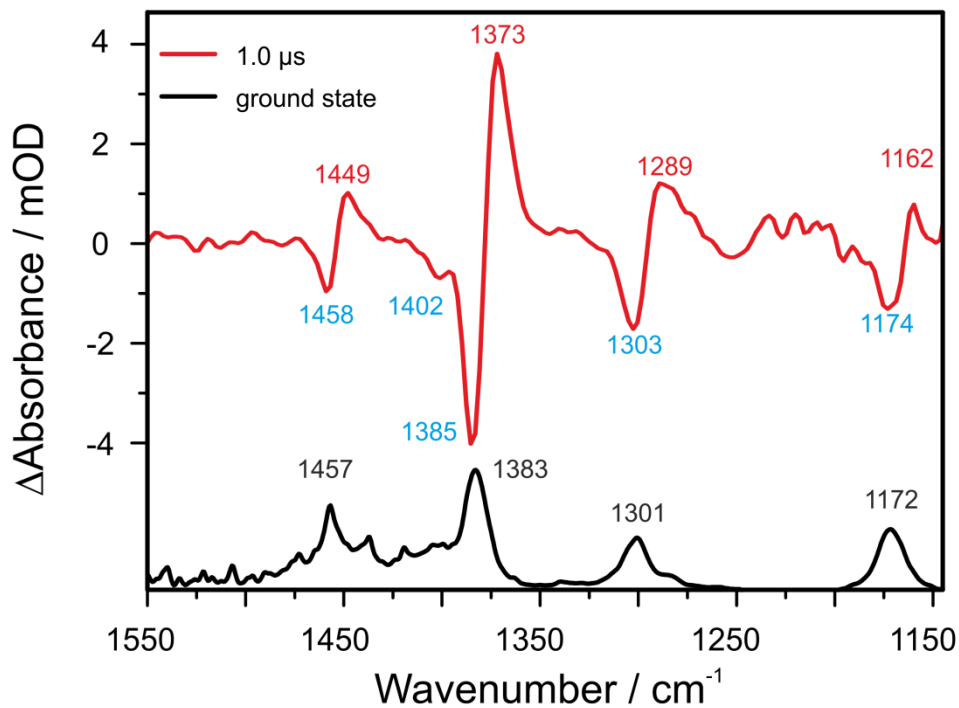

**Fig. SI\_6:** Ground state FTIR spectrum (bottom) and TR-FTIR spectrum 1.0  $\mu\text{s}$  after UV excitation at 355 nm (top).

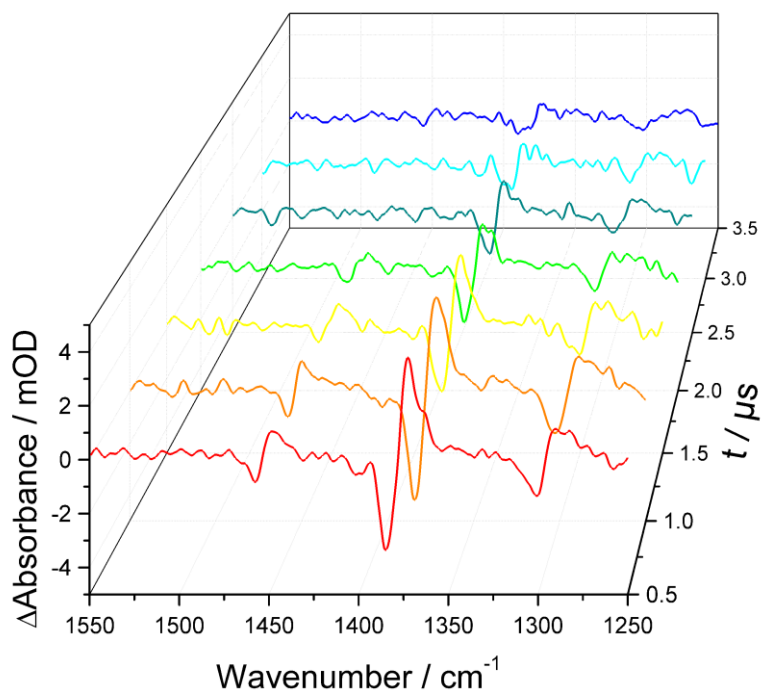

**Fig. SI\_7:** Transient IR spectra in the region from 500 ns to 3.5  $\mu\text{s}$  in steps of 500 ns. The spectra show the decay of the long-lived  $^3\text{A}$  state.

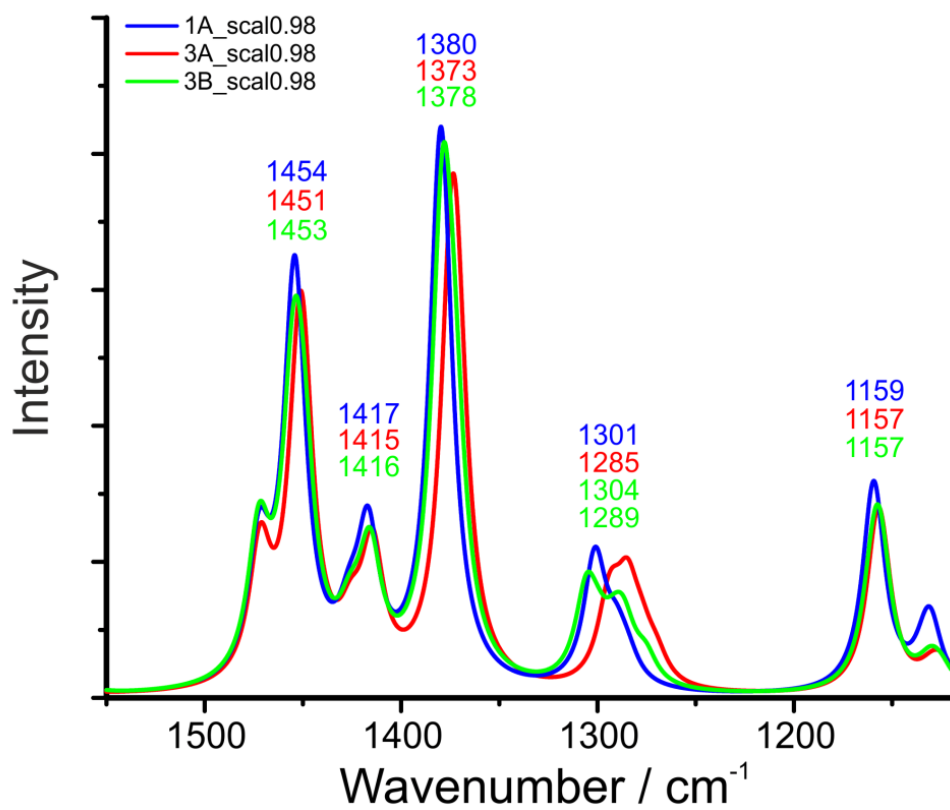

**Fig. SI\_8:** Calculated spectra for the  $^1A$  (blue),  $^3A$  (red) and  $^3B$  (green) states (Lorentzian functions with a FWHM of  $14 \text{ cm}^{-1}$  are used).

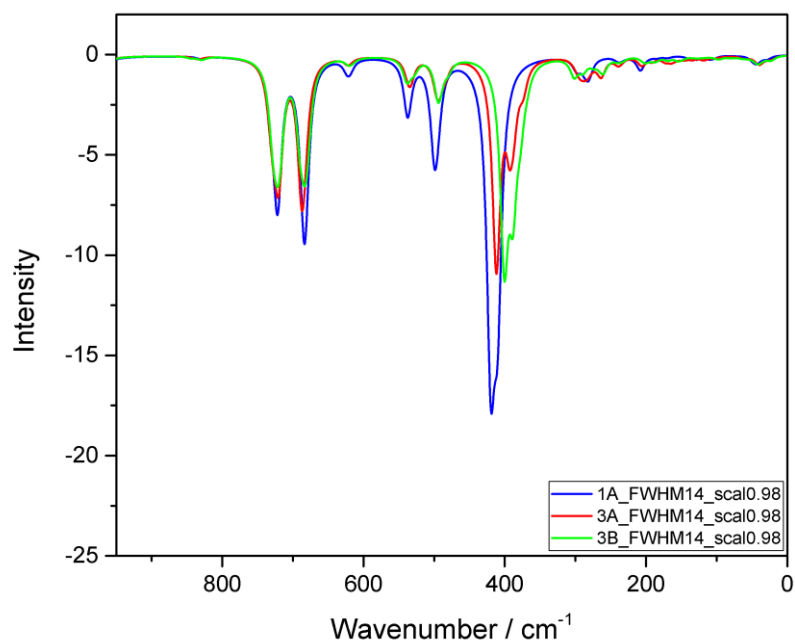

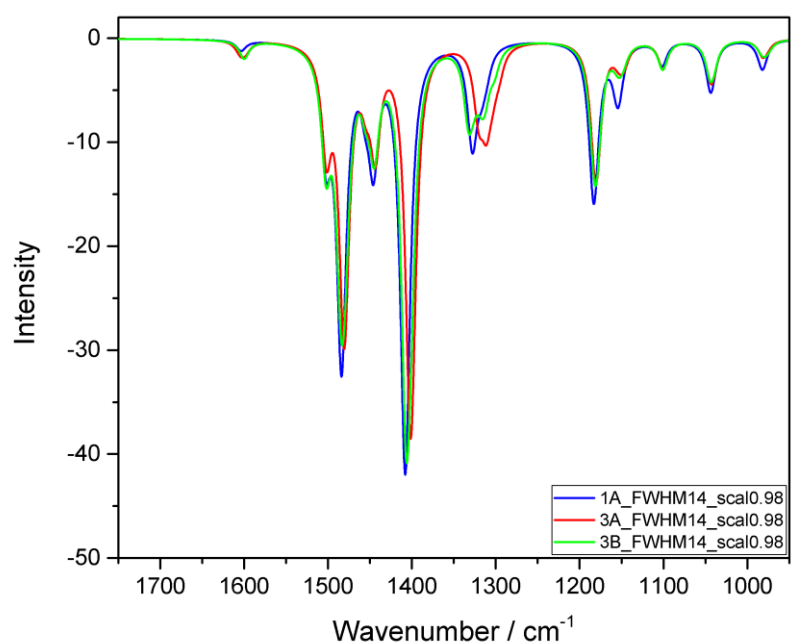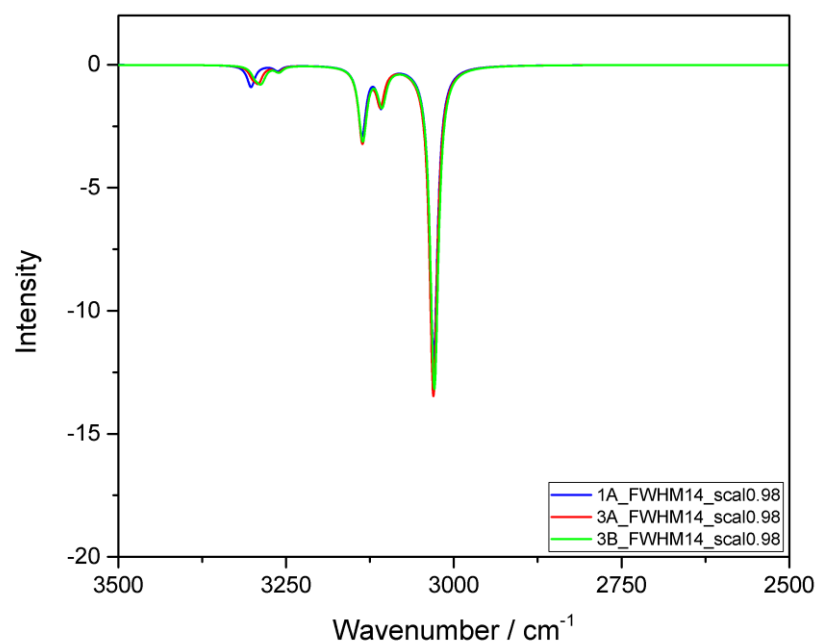

**Fig. SI\_9:** Calculated IR spectra for the  $^1A$ ,  $^3A$ , and  $^3B$  states in the complete IR region up to 3500  $\text{cm}^{-1}$ . No transitions are observed in the region from 1700 to 2500  $\text{cm}^{-1}$ . It is obvious that the red and green curves ( $^3A$  and  $^3B$  states) show differences only in the measured region from 1100 to 1600  $\text{cm}^{-1}$  and in the region around 400  $\text{cm}^{-1}$  which is not accessible with our IR set-ups.

**Table SI\_1:** Cartesian coordinates (in Å) of the  $^1A_1$  ground state of  $[Pd_3\{Si(mt^{Mc})_3\}_2]$ . The B3LYP/TZVP energy is -4938.263624 Hartree.

|    |            |            |            |
|----|------------|------------|------------|
| H  | -5.5177782 | 0.6889601  | -4.3269591 |
| H  | -5.4102038 | 1.0737491  | -2.5704154 |
| H  | -5.5177782 | -0.6889601 | 4.3269591  |
| H  | -4.7836185 | 2.2376234  | -3.7717760 |
| C  | -4.9030875 | 1.1635666  | -3.5460714 |
| H  | -4.7836185 | -2.2376234 | 3.7717760  |
| C  | -4.9030875 | -1.1635666 | 3.5460714  |
| H  | -5.4102038 | -1.0737491 | 2.5704154  |
| H  | -3.8079458 | 0.9333994  | 5.1210978  |
| N  | -3.6131742 | 0.5032239  | -3.5024360 |
| H  | -3.8079458 | -0.9333994 | -5.1210978 |
| N  | -3.6131742 | -0.5032239 | 3.5024360  |
| C  | -3.1778529 | 0.5215421  | 4.3354879  |
| C  | -3.1778529 | -0.5215421 | -4.3354879 |
| S  | -2.7110267 | 2.0146202  | -1.4170612 |
| C  | -2.6260674 | 0.7920709  | -2.6005028 |
| C  | -2.6260674 | -0.7920709 | 2.6005028  |
| C  | -1.9199457 | 0.8485875  | 3.9328329  |
| S  | -2.7110267 | -2.0146202 | 1.4170612  |
| C  | -1.9199457 | -0.8485875 | -3.9328329 |
| H  | -1.2486690 | 1.6082782  | 4.3191649  |
| H  | 0.4539706  | 5.2615468  | 3.7717760  |
| N  | -1.5752732 | -0.0368514 | -2.8590270 |
| N  | -1.5752732 | 0.0368514  | 2.8590270  |
| S  | -0.3891990 | 3.3551281  | 1.4170612  |
| H  | -0.7684752 | 1.8855182  | -4.3191649 |
| H  | -1.2486690 | -1.6082782 | -4.3191649 |
| Pd | -0.8123350 | 1.4070056  | 0.0000000  |
| C  | 1.4438655  | 4.8279816  | 3.5460714  |
| H  | 2.1622321  | 5.1230162  | 4.3269591  |
| H  | 1.7752079  | 5.2222485  | 2.5704154  |
| C  | 0.2250745  | 2.0870155  | -3.9328329 |
| Pd | -0.8123350 | -1.4070056 | 0.0000000  |
| C  | 0.6270802  | 2.6702765  | 2.6005028  |
| H  | -0.7684752 | -1.8855182 | 4.3191649  |
| N  | 1.3707824  | 3.3807126  | 3.5024360  |
| H  | 1.0956253  | 3.7644775  | -5.1210978 |
| Si | 0.0000000  | 0.0000000  | -1.8098837 |
| Si | 0.0000000  | 0.0000000  | 1.8098837  |
| S  | -0.3891990 | -3.3551281 | -1.4170612 |
| C  | 1.1372578  | 3.0128724  | -4.3354879 |
| N  | 0.7557223  | 1.3826523  | -2.8590270 |
| N  | 0.8195509  | 1.3458009  | 2.8590270  |
| C  | 2.0405951  | 2.4913303  | 4.3354879  |
| C  | 0.2250745  | -2.0870155 | 3.9328329  |
| N  | 0.8195509  | -1.3458009 | -2.8590270 |
| C  | 0.6270802  | -2.6702765 | -2.6005028 |
| C  | 1.6948712  | 1.2384280  | 3.9328329  |
| H  | 2.7123205  | 2.8310781  | 5.1210978  |
| N  | 0.7557223  | -1.3826523 | 2.8590270  |
| C  | 1.9989872  | 1.8782057  | -2.6005028 |
| N  | 2.2423918  | 2.8774887  | -3.5024360 |
| Pd | 1.6246701  | 0.0000000  | 0.0000000  |
| H  | 2.0171443  | 0.2772400  | 4.3191649  |
| H  | 1.7752079  | -5.2222485 | -2.5704154 |

|   |           |            |            |
|---|-----------|------------|------------|
| C | 1.6948712 | -1.2384280 | -3.9328329 |
| N | 1.3707824 | -3.3807126 | -3.5024360 |
| H | 0.4539706 | -5.2615468 | -3.7717760 |
| H | 2.0171443 | -0.2772400 | -4.3191649 |
| C | 1.1372578 | -3.0128724 | 4.3354879  |
| H | 1.0956253 | -3.7644775 | 5.1210978  |
| C | 1.4438655 | -4.8279816 | -3.5460714 |
| H | 3.3555461 | 4.4340560  | -4.3269591 |
| C | 2.0405951 | -2.4913303 | -4.3354879 |
| C | 3.4592220 | 3.6644151  | -3.5460714 |
| C | 1.9989872 | -1.8782057 | 2.6005028  |
| S | 3.1002257 | 1.3405078  | -1.4170612 |
| H | 2.7123205 | -2.8310781 | -5.1210978 |
| H | 3.6349959 | 4.1484994  | -2.5704154 |
| N | 2.2423918 | -2.8774887 | 3.5024360  |
| H | 2.1622321 | -5.1230162 | -4.3269591 |
| H | 4.3296479 | 3.0239235  | -3.7717760 |
| S | 3.1002257 | -1.3405078 | 1.4170612  |
| C | 3.4592220 | -3.6644151 | 3.5460714  |
| H | 3.3555461 | -4.4340560 | 4.3269591  |
| H | 4.3296479 | -3.0239235 | 3.7717760  |
| H | 3.6349959 | -4.1484994 | 2.5704154  |

**Table SI\_2:** Cartesian coordinates (in Å) of the  $^3A$  state.  
The B3LYP/TZVP energy is -4938.197791 Hartree.

|    |            |            |            |
|----|------------|------------|------------|
| H  | 0.8748276  | -4.1871795 | -5.5984547 |
| H  | 1.2459921  | -2.4357379 | -5.3953101 |
| H  | -0.8748276 | 4.1871795  | -5.5984547 |
| H  | 2.4143738  | -3.6600678 | -4.8248996 |
| C  | 1.3396363  | -3.4361616 | -4.9405572 |
| H  | -2.4143738 | 3.6600678  | -4.8248996 |
| C  | -1.3396363 | 3.4361616  | -4.9405572 |
| H  | -1.2459921 | 2.4357379  | -5.3953101 |
| H  | 0.7303072  | 5.1009991  | -3.9431038 |
| N  | 0.6690034  | -3.4657344 | -3.6550935 |
| H  | -0.7303072 | -5.1009991 | -3.9431038 |
| N  | -0.6690034 | 3.4657344  | -3.6550935 |
| C  | 0.3415322  | 4.3379719  | -3.2720341 |
| C  | -0.3415322 | -4.3379719 | -3.2720341 |
| S  | 2.1384931  | -1.3996620 | -2.6565499 |
| C  | 0.9358540  | -2.6087381 | -2.6217803 |
| C  | -0.9358540 | 2.6087381  | -2.6217803 |
| C  | 0.6893185  | 4.0048788  | -1.9992719 |
| S  | -2.1384931 | 1.3996620  | -2.6565499 |
| C  | -0.6893185 | -4.0048788 | -1.9992719 |
| H  | 1.4509870  | 4.4317117  | -1.3549825 |
| H  | 5.2926646  | 3.7721119  | 0.6701934  |
| N  | 0.1014426  | -2.9370974 | -1.5914833 |
| N  | -0.1014426 | 2.9370974  | -1.5914833 |
| S  | 3.3353873  | 1.6342837  | -0.4930266 |
| H  | 1.7579743  | -4.5528915 | -0.5265018 |
| H  | -1.4509870 | -4.4317117 | -1.3549825 |
| Pd | 1.3745789  | 0.0779309  | -0.8381850 |
| C  | 4.7938913  | 3.5105848  | 1.6195270  |
| H  | 5.0821162  | 4.2323757  | 2.3999153  |



|    |            |            |            |
|----|------------|------------|------------|
| H  | 5.1229008  | 2.4986486  | 1.9108596  |
| C  | 2.0736286  | -4.0240618 | 0.3676504  |
| Pd | -1.3745789 | -0.0779309 | -0.8381850 |
| C  | 2.6489539  | 2.7553691  | 0.5927308  |
| H  | -1.7579743 | 4.5528915  | -0.5265018 |
| N  | 3.3529018  | 3.5449887  | 1.4634546  |
| H  | 3.8320845  | -5.0993035 | 1.2242639  |
| Si | -0.0001430 | -1.9390473 | 0.0004931  |
| Si | 0.0001430  | 1.9390473  | 0.0004931  |
| S  | -3.3353873 | -1.6342837 | -0.4930266 |
| C  | 3.0940013  | -4.2997428 | 1.2230307  |
| N  | 1.4309116  | -2.8694562 | 0.8016883  |
| N  | 1.3233815  | 3.0498118  | 0.7529966  |
| C  | 2.4639145  | 4.3423272  | 2.1721433  |
| C  | -2.0736286 | 4.0240618  | 0.3676504  |
| N  | -1.3233815 | -3.0498118 | 0.7529966  |
| C  | -2.6489539 | -2.7553691 | 0.5927308  |
| C  | 1.2138115  | 4.0332206  | 1.7295383  |
| H  | 2.8006672  | 5.0495468  | 2.9273365  |
| N  | -1.4309116 | 2.8694562  | 0.8016883  |
| C  | 2.0646233  | -2.4307275 | 1.9332635  |
| N  | 3.0862559  | -3.3049186 | 2.1925416  |
| Pd | 0.0000000  | 0.0000000  | 1.4872471  |
| H  | 0.2509468  | 4.4269755  | 2.0415379  |
| H  | -5.1229008 | -2.4986486 | 1.9108596  |
| C  | -1.2138115 | -4.0332206 | 1.7295383  |
| N  | -3.3529018 | -3.5449887 | 1.4634546  |
| H  | -5.2926646 | -3.7721119 | 0.6701934  |
| H  | -0.2509468 | -4.4269755 | 2.0415379  |
| C  | -3.0940013 | 4.2997428  | 1.2230307  |
| H  | -3.8320845 | 5.0993035  | 1.2242639  |
| C  | -4.7938913 | -3.5105848 | 1.6195270  |
| H  | 4.7620088  | -3.9814347 | 3.2283178  |
| C  | -2.4639145 | -4.3423272 | 2.1721433  |
| C  | 4.0102868  | -3.1799312 | 3.3028538  |
| C  | -2.0646233 | 2.4307275  | 1.9332635  |
| S  | 1.6918532  | -1.0913204 | 2.9224468  |
| H  | -2.8006672 | -5.0495468 | 2.9273365  |
| H  | 4.5107330  | -2.1973411 | 3.2723194  |
| N  | -3.0862559 | 3.3049186  | 2.1925416  |
| H  | -5.0821162 | -4.2323757 | 2.3999153  |
| H  | 3.4757379  | -3.2614805 | 4.2652531  |
| S  | -1.6918532 | 1.0913204  | 2.9224468  |
| C  | -4.0102868 | 3.1799312  | 3.3028538  |
| H  | -4.7620088 | 3.9814347  | 3.2283178  |
| H  | -3.4757379 | 3.2614805  | 4.2652531  |
| H  | -4.5107330 | 2.1973411  | 3.2723194  |

**Table SI\_3:** Cartesian coordinates (in Å) of the  $^3B$  state.  
The B3LYP/TZVP energy is -4938.189711 Hartree.

|   |            |            |            |
|---|------------|------------|------------|
| H | 0.9962251  | -4.0225473 | -5.5372223 |
| H | 1.4124360  | -2.2934011 | -5.2486265 |
| H | -0.9962251 | 4.0225473  | -5.5372223 |
| H | 2.5028232  | -3.5773106 | -4.6552960 |
| C | 1.4447118  | -3.3116778 | -4.8255032 |
| H | -2.5028232 | 3.5773106  | -4.6552960 |

|    |            |            |            |
|----|------------|------------|------------|
| C  | -1.4447118 | 3.3116778  | -4.8255032 |
| H  | -1.4124360 | 2.2934011  | -5.2486265 |
| H  | 0.7395342  | 4.9339027  | -4.0097373 |
| N  | 0.6975424  | -3.3609359 | -3.5844263 |
| H  | -0.7395342 | -4.9339027 | -4.0097373 |
| N  | -0.6975424 | 3.3609359  | -3.5844263 |
| C  | 0.3625962  | 4.2111836  | -3.2890849 |
| C  | -0.3625962 | -4.2111836 | -3.2890849 |
| S  | 2.1505536  | -1.3617144 | -2.4227853 |
| C  | 0.9286421  | -2.5476249 | -2.5085016 |
| C  | -0.9286421 | 2.5476249  | -2.5085016 |
| C  | 0.7723236  | 3.9071530  | -2.0269947 |
| S  | -2.1505536 | 1.3617144  | -2.4227853 |
| C  | -0.7723236 | -3.9071530 | -2.0269947 |
| H  | 1.5872068  | 4.3226097  | -1.4426444 |
| H  | 5.3033516  | 3.8929305  | 0.6240733  |
| N  | 0.0281200  | -2.8815269 | -1.5415676 |
| N  | -0.0281200 | 2.8815269  | -1.5415676 |
| S  | 3.3575724  | 1.6358085  | -0.3679581 |
| H  | 1.4263405  | -4.7492574 | -0.3743776 |
| H  | -1.5872068 | -4.3226097 | -1.4426444 |
| Pd | 1.4062096  | 0.0135065  | -0.5308291 |
| C  | 4.8283695  | 3.6658617  | 1.5945227  |
| H  | 5.1179768  | 4.4284488  | 2.3347284  |
| H  | 5.1846177  | 2.6747536  | 1.9236783  |
| C  | 1.8816132  | -4.1786087 | 0.4302795  |
| Pd | -1.4062096 | -0.0135065 | -0.5308291 |
| C  | 2.6809646  | 2.8137802  | 0.6544196  |
| H  | -1.4263405 | 4.7492574  | -0.3743776 |
| N  | 3.3848982  | 3.6643791  | 1.4671995  |
| H  | 3.6512007  | -5.3182137 | 1.1805215  |
| Si | -0.0483792 | -1.9335142 | 0.0783896  |
| Si | 0.0483792  | 1.9335142  | 0.0783896  |
| S  | -3.3575724 | -1.6358085 | -0.3679581 |
| C  | 2.9747452  | -4.4659405 | 1.1885621  |
| N  | 1.3747155  | -2.9492718 | 0.8323310  |
| N  | 1.3533955  | 3.0913030  | 0.8196644  |
| C  | 2.4909816  | 4.4801654  | 2.1496915  |
| C  | -1.8816132 | 4.1786087  | 0.4302795  |
| N  | -1.3533955 | -3.0913030 | 0.8196644  |
| C  | -2.6809646 | -2.8137802 | 0.6544196  |
| C  | 1.2407091  | 4.1225107  | 1.7461219  |
| H  | 2.8250788  | 5.2326471  | 2.8611796  |
| N  | -1.3747155 | 2.9492718  | 0.8323310  |
| C  | 2.1635231  | -2.4785483 | 1.8336830  |
| N  | 3.1472130  | -3.3996690 | 2.0628621  |
| Pd | 0.0000000  | 0.0000000  | 1.9580860  |
| H  | 0.2773821  | 4.5164646  | 2.0562196  |
| H  | -5.1846177 | -2.6747536 | 1.9236783  |
| C  | -1.2407091 | -4.1225107 | 1.7461219  |
| N  | -3.3848982 | -3.6643791 | 1.4671995  |
| H  | -5.3033516 | -3.8929305 | 0.6240733  |
| H  | -0.2773821 | -4.5164646 | 2.0562196  |
| C  | -2.9747452 | 4.4659405  | 1.1885621  |
| H  | -3.6512007 | 5.3182137  | 1.1805215  |
| C  | -4.8283695 | -3.6658617 | 1.5945227  |
| H  | 4.8606231  | -4.1340547 | 2.9935198  |
| C  | -2.4909816 | -4.4801654 | 2.1496915  |
| C  | 4.2090482  | -3.2475335 | 3.0395183  |

|   |            |            |           |
|---|------------|------------|-----------|
| C | -2.1635231 | 2.4785483  | 1.8336830 |
| S | 2.0259751  | -1.0003265 | 2.6835643 |
| H | -2.8250788 | -5.2326471 | 2.8611796 |
| H | 4.8017519  | -2.3422998 | 2.8230059 |
| N | -3.1472130 | 3.3996690  | 2.0628621 |
| H | -5.1179768 | -4.4284488 | 2.3347284 |
| H | 3.7891605  | -3.1507458 | 4.0555210 |
| S | -2.0259751 | 1.0003265  | 2.6835643 |
| C | -4.2090482 | 3.2475335  | 3.0395183 |
| H | -4.8606231 | 4.1340547  | 2.9935198 |
| H | -3.7891605 | 3.1507458  | 4.0555210 |
| H | -4.8017519 | 2.3422998  | 2.8230059 |
